# Supplementary material for: Origin and Evolution of Sulfadoxine Resistant Plasmodium falciparum
Source: PLOS journal article supplement (doi:10.1371/journal.ppat.1000830), 2010-03-25
Supplement: S5 (10.1371/journal.ppat.1000830.s005) [file journal.ppat.1000830.s005]

**Table S5: The 10-loci microsatellite haplotype profiles of the *dhps* alleles in Cambodia**

|     | H   | -11 | -7.5 | -2.9 | -1.5 | -0.13 | Genotype | 0.03 | 0.5 | 1.4 | 6.4 | 9   | N |
|-----|-----|-----|------|------|------|-------|----------|------|-----|-----|-----|-----|---|
| A   | H1  | 220 | 173  | 191  | 172  | 134   | SAKAA    | 134  | 147 | 252 | 286 | 100 | 1 |
|     | H2  | 220 | 194  | 193  | 182  | 134   | SAKAA    | 132  | 147 | 256 | 303 | 100 | 1 |
|     | H3  | 220 | 194  | 189  | 182  | 134   | SAKAA    | 132  | 147 | 256 | 303 | 100 | 1 |
|     | H4  | 220 | 175  | 189  | 164  | 132   | SAKAA    | 160  | 150 | 258 | 292 | 123 | 1 |
|     | H5  | 220 | 173  | 189  | 166  | 134   | SAKAA    | 126  | 140 | 269 | 288 | 109 | 1 |
|     | H6  | 220 | 167  | 178  | 168  | 134   | SAKAA    | 147  | 143 | 266 | 288 | 120 | 1 |
|     | H7  | 220 | 183  | 189  | 170  | 132   | SAKAA    | 156  | 147 | 282 | 295 | 118 | 1 |
|     | H8  | 220 | 163  | 191  | 174  | 134   | SAKAA    | 138  | 147 | 254 | 297 | 115 | 1 |
|     | H9  | 220 | 173  | 193  | 178  | 132   | SAKAA    | 132  | 148 | 280 | 289 | 100 | 1 |
|     | H10 | 224 | 181  | 189  | 170  | 134   | SAKAA    | 126  | 145 | 254 | 294 | 114 | 1 |
|     | H11 | 220 | 172  | 189  | 168  | 134   | SAKAA    | 145  | 147 | 274 | 286 | 114 | 1 |
|     | H12 | 220 | 169  | 193  | 188  | 132   | SAKAA    | 141  | 145 | 261 | 295 | 115 | 1 |
|     | H13 | 228 | 181  | 191  | 168  | 134   | SAKAA    | 136  | 143 | 252 | 310 | 119 | 1 |
|     | H14 | 220 | 161  | 189  | 166  | 132   | SAKAA    | 126  | 145 | 254 | 299 | 109 | 1 |
|     | H15 | 220 | 153  | 191  | 166  | 134   | SAKAA    | 128  | 146 | 257 | 299 | 100 | 1 |
|     | H16 | 220 | 165  | 191  | 168  | 134   | SAKAA    | 130  | 145 | 273 | 297 | 122 | 1 |
|     | H17 | 220 | 169  | 193  | 172  | 134   | SAKAA    | 136  | 146 | 254 | 286 | 106 | 1 |
|     | H18 | 220 | 183  | 189  | 172  | 134   | SAKAA    | 128  | 150 | 255 | 286 | 113 | 1 |
|     | H19 | 220 | 177  | 189  | 165  | 132   | SAKAA    | 128  | 150 | 257 | 303 | 115 | 1 |
|     | H20 | 220 | 161  | 183  | 168  | 132   | SAKAA    | 130  | 145 | 263 | 292 | 110 | 1 |
| B   | H21 | 220 | 163  | 183  | 168  | 132   | SGKAA    | 126  | 145 | 277 | 292 | 111 | 2 |
|     | H22 | 220 | 163  | 183  | 168  | 132   | SGKAA    | 126  | 145 | 277 | 292 | 109 | 1 |
|     | H23 | 220 | 163  | 183  | 168  | 132   | SGKAA    | 128  | 145 | 277 | 292 | 109 | 1 |
|     | H24 | 220 | 163  | 183  | 168  | 132   | SGKAA    | 126  | 145 | 277 | 286 | 102 | 1 |
|     | H25 | 220 | 195  | 183  | 168  | 132   | SGKAA    | 126  | 145 | 277 | 292 | 109 | 1 |
|     | H26 | 220 | 173  | 193  | 168  | 132   | SGKAA    | 126  | 145 | 268 | 292 | 109 | 1 |
|     | H27 | 220 | 165  | 189  | 168  | 134   | SGKAA    | 126  | 150 | 248 | 295 | 91  | 1 |
|     | H28 | 216 | 153  | 189  | 178  | 134   | SGKAA    | 126  | 150 | 248 | 295 | 92  | 1 |
|     | H29 | 220 | 182  | 189  | 172  | 134   | SGKAA    | 126  | 150 | 248 | 299 | 93  | 1 |
|     | H30 | 220 | 165  | 189  | 172  | 134   | SGKAA    | 126  | 150 | 248 | 295 | 109 | 1 |
|     | H31 | 220 | 175  | 189  | 172  | 134   | SGKAA    | 132  | 150 | 248 | 292 | 109 | 1 |
|     | H32 | 224 | 179  | 189  | 166  | 132   | SGKAA    | 143  | 145 | 275 | 292 | 110 | 1 |
|     | H33 | 220 | 169  | 189  | 196  | 132   | SGKAA    | 138  | 139 | 266 | 297 | 100 | 1 |
|     | H34 | 220 | 171  | 183  | 176  | 132   | SGKAA    | 130  | 146 | 263 | 297 | 97  | 1 |
|     | H35 | 220 | 167  | 183  | 170  | 134   | SGKAA    | 126  | 150 | 256 | 286 | 113 | 1 |
| C   | H47 | 216 | 153  | 191  | 172  | 134   | SGKGA    | 141  | 145 | 252 | 286 | 100 | 4 |
|     | H48 | 216 | 153  | 191  | 172  | 134   | SGKGA    | 141  | 145 | 252 | 286 | 102 | 6 |
|     | H49 | 216 | 153  | 189  | 172  | 134   | SGKGA    | 141  | 145 | 252 | 286 | 100 | 1 |
|     | H50 | 216 | 152  | 191  | 172  | 134   | SGKGA    | 141  | 146 | 251 | 285 | 100 | 1 |
|     | H47 | 216 | 153  | 191  | 172  | 134   | SGKGA    | 141  | 145 | 252 | 286 | 100 | 5 |
|     | H48 | 216 | 153  | 191  | 172  | 134   | SGEGA    | 141  | 145 | 252 | 286 | 102 | 3 |
|     | H72 | 220 | 153  | 191  | 172  | 134   | SGEGA    | 141  | 145 | 252 | 286 | 100 | 2 |
|     | H73 | 220 | 167  | 191  | 172  | 134   | SGEGA    | 141  | 145 | 252 | 285 | 102 | 1 |
|     | H47 | 216 | 153  | 191  | 172  | 134   | SGNGA    | 141  | 145 | 252 | 286 | 100 | 4 |
|     | H48 | 216 | 153  | 191  | 172  | 134   | SGNGA    | 141  | 145 | 252 | 286 | 102 | 4 |
|     | H74 | 216 | 153  | 191  | 172  | 134   | SGNGA    | 141  | 145 | 252 | 299 | 100 | 4 |
|     | H75 | 216 | 153  | 191  | 172  | 134   | SGNGA    | 141  | 145 | 252 | 299 | 102 | 5 |
|     | H76 | 216 | 153  | 191  | 172  | 134   | SGNGA    | 141  | 145 | 252 | 299 | 109 | 3 |
|     | H77 | 216 | 153  | 191  | 174  | 134   | SGNGA    | 141  | 145 | 252 | 286 | 102 | 2 |
|     | H78 | 220 | 167  | 191  | 172  | 134   | SGNGA    | 141  | 145 | 252 | 286 | 100 | 1 |
| H79 | 216 | 153 | 191  | 172  | 134  | SGNGA | 156      | 145  | 227 | 301 | 102 | 1   |   |
| H80 | 216 | 153 | 191  | 172  | 134  | SGNGA | 126      | 145  | 252 | 299 | 102 | 1   |   |
| H81 | 216 | 153 | 195  | 172  | 134  | SGNGA | 141      | 145  | 252 | 286 | 102 | 1   |   |
| H82 | 216 | 153 | 180  | 172  | 134  | SGNGA | 141      | 145  | 250 | 299 | 100 | 1   |   |
| D   | H37 | 220 | 167  | 183  | 172  | 134   | AGKAA    | 126  | 145 | 250 | 299 | 109 | 2 |
|     | H38 | 216 | 173  | 189  | 172  | 134   | AGKAA    | 126  | 145 | 250 | 299 | 109 | 1 |
|     | H39 | 220 | 167  | 193  | 172  | 134   | AGKAA    | 126  | 145 | 250 | 299 | 109 | 1 |
|     | H40 | 220 | 175  | 183  | 172  | 134   | AGKAA    | 126  | 145 | 250 | 299 | 109 | 1 |
|     | H41 | 220 | 167  | 183  | 170  | 132   | AGKAA    | 126  | 145 | 250 | 299 | 109 | 1 |
|     | H42 | 220 | 167  | 183  | 172  | 134   | AGKAA    | 126  | 145 | 250 | 292 | 126 | 1 |
|     | H43 | 220 | 167  | 183  | 172  | 134   | AGKAA    | 126  | 145 | 250 | 292 | 110 | 1 |
|     | H44 | 220 | 175  | 183  | 169  | 132   | AGKAA    | 126  | 150 | 279 | 292 | 111 | 1 |
|     | H45 | 220 | 153  | 191  | 170  | 134   | AGKAA    | 126  | 145 | 227 | 292 | 123 | 1 |
|     | H59 | 216 | 153  | 183  | 172  | 134   | AGEAA    | 126  | 145 | 250 | 299 | 109 | 3 |
|     | H60 | 216 | 153  | 183  | 172  | 134   | AGEAA    | 126  | 145 | 251 | 299 | 109 | 1 |
|     | H61 | 216 | 167  | 183  | 172  | 134   | AGEAA    | 126  | 145 | 250 | 299 | 109 | 1 |
|     | H62 | 218 | 153  | 183  | 172  | 134   | AGEAA    | 126  | 145 | 250 | 299 | 109 | 1 |
|     | H37 | 220 | 167  | 183  | 172  | 134   | AGEAA    | 126  | 145 | 250 | 299 | 109 | 9 |
|     | H63 | 220 | 167  | 191  | 172  | 134   | AGEAA    | 126  | 145 | 250 | 299 | 109 | 3 |
| H64 | 220 | 178 | 189  | 172  | 134  | AGEAA | 126      | 145  | 252 | 299 | 109 | 1   |   |
| H65 | 220 | 167 | 183  | 172  | 134  | AGEAA | 126      | 143  | 250 | 299 | 109 | 1   |   |
| H66 | 220 | 167 | 183  | 176  | 134  | AGEAA | 126      | 143  | 250 | 299 | 109 | 1   |   |
| H67 | 220 | 167 | 183  | 174  | 134  | AGEAA | 126      | 145  | 250 | 299 | 109 | 1   |   |
| H68 | 220 | 177 | 183  | 166  | 134  | AGEAA | 126      | 145  | 250 | 299 | 109 | 1   |   |
| H69 | 220 | 167 | 191  | 172  | 134  | AGEAA | 126      | 145  | 250 | 299 | 110 | 1   |   |
| H70 | 220 | 167 | 183  | 172  | 134  | AGEAA | 126      | 145  | 227 | 299 | 109 | 1   |   |
| H71 | 220 | 153 | 183  | 172  | 134  | AGEAA | 127      | 145  | 227 | 286 | 109 | 1   |   |
| E   | H51 | 220 | 167  | 189  | 172  | 134   | SGEAA    | 126  | 145 | 250 | 299 | 109 | 2 |
|     | H52 | 220 | 173  | 189  | 172  | 134   | SGEAA    | 126  | 150 | 248 | 295 | 93  | 5 |
|     | H53 | 220 | 176  | 189  | 172  | 134   | SGEAA    | 126  | 150 | 248 | 295 | 92  | 2 |
|     | H54 | 216 | 153  | 191  | 172  | 134   | SGEAA    | 141  | 145 | 272 | 286 | 100 | 1 |
|     | H55 | 220 | 167  | 189  | 172  | 134   | SGEAA    | 126  | 150 | 248 | 295 | 93  | 1 |
|     | H56 | 220 | 194  | 189  | 172  | 134   | SGEAA    | 126  | 150 | 248 | 295 | 93  | 1 |
|     | H57 | 220 | 194  | 189  | 172  | 134   | SGEAA    | 132  | 150 | 248 | 295 | 92  | 1 |
|     | H58 | 220 | 194  | 189  | 172  | 134   | SGEAA    | 126  | 150 | 248 | 286 | 102 | 1 |
| F   | H84 | 216 | 153  | 183  | 172  | 134   | AGEAT    | 126  | 150 | 272 | 292 | 111 | 1 |
|     | H85 | 216 | 153  | 191  | 172  | 134   | AGEAT    | 126  | 150 | 272 | 292 | 111 | 1 |
|     | H36 | 220 | 165  | 183  | 168  | 134   | AAKAA    | 132  | 145 | 266 | 292 | 119 | 1 |
|     | H83 | 220 | 167  | 183  | 172  | 134   | AGKAT    | 126  | 145 | 248 | 299 | 109 | 1 |
| H46 | 220 | 175 | 183  | 169  | 132  | FGKAA | 126      | 150  | 252 | 295 | 110 | 1   |   |

**Note:** Identical colors (shaded boxes) in the haplotype column represent proposed common lineages. The wild type (SAKAA) in panel A and single mutant (SGKAA) in panel B have multiple unique haplotypes backgrounds (as indicated by scattered pink, gray and blue shading) and contain allele sizes present in the C, D, E and F panels. The single mutant SGKAA lineage gives rise to the double mutant SGKGA lineage (predominantly pink shaded haplotypes in panel C) which in turn gives rise to two triple mutants, SGEGA and SGNGA. Lineage B also gives rise to the double mutant AGKAA which is a precursor for the triple mutant AGEAA (predominantly gray shaded haplotypes in panel D). Lineage B also gives rise to the third double mutant, SGEAA which is shaded predominantly blue (Panel E). Panel F has limited and rare *dhps* alleles with different haplotype backgrounds. H, Haplotype; N, number of isolates sharing a particular haplotype. The list of haplotypes in panels C, D, E and F are not in any particular order.
